# Supplementary material for: Impact of maternal Lactiplantibacillus plantarum S58 supplementation on offspring rat immunity and gut health
Source: Royal Society of Chemistry journal article supplement (doi:10.1039/d4fo04702h), 2025-01-01
Supplement: d4fo04702h1.xlsx [file d4fo04702h1.xlsx]

## Sheet: Sheet1
Table S1 Primer sequences
	Forward primer	Reverse primer
TLR2	5’-GCACTTGAGCGAGTCTGCTTTC -3’	5’-GAACAAATAGAATCGGGGGATGTG -3’
TLR4	5’-GGAACAAACAGCCTGAGACAC -3’	5’-CAAGGGATAAGAACGCTGAGAA -3’
TNF-α	5’-GCATGATCCGAGATGTGGAACTGG-3’	5’-CGCCACGAGCAGGAATGAGAAG-3’
IL-1β	5’-AAATGCCTCGTGCTGTCTGA-3’	5’-AGGCCACAGGGATTTTGTCG-3’
Claudin-3	5’-AAGATCCTCTATTCCGCGCC-3’	5’-ATCGACGGTTGGTAGTGGTG-3’
Occludin	5’-CCAATGGCCTACTCCTCCAA-3’	5’-CATCCACGGACAAGGTCAGA-3’
ZO-1	5’-CAGGCCATTACGAGCCTCTC-3’	5’-AGGCTGTGGCTTGGTAGCTG-3’
GAPDH	5’-CTGGAGAAACCTGCCAAGTATG-3’	5’-GGTGGAAGAATGGGAGTTGCT-3’
