# Supplementary material for: Impact of maternal Lactiplantibacillus plantarum S58 supplementation on offspring rat immunity and gut health
Source: Royal Society of Chemistry journal article supplement (doi:10.1039/d4fo04702h), 2025-01-01
Supplement: d4fo04702h2.pdf [file d4fo04702h2.pdf]

Relative average fluorescence intensity of IL-17A、IL-22、TLR2 and TLR4 in colon  
 of the offspring rats

|        | Control                 | C-S                     | S-C                     | S-S                     |
|--------|-------------------------|-------------------------|-------------------------|-------------------------|
| IL-17A | 15.15±0.78 <sup>a</sup> | 14.46±0.76 <sup>a</sup> | 12.92±0.65 <sup>b</sup> | 14.10±0.31 <sup>a</sup> |
| IL-22  | 17.11±1.57 <sup>b</sup> | 19.07±0.72 <sup>a</sup> | 16.74±0.90 <sup>b</sup> | 18.48±1.03 <sup>b</sup> |
| TLR2   | 18.05±1.13 <sup>b</sup> | 18.46±1.28 <sup>b</sup> | 20.06±0.80 <sup>a</sup> | 19.44±1.20 <sup>b</sup> |
| TLR4   | 24.47±0.96 <sup>c</sup> | 22.82±2.33 <sup>c</sup> | 20.25±2.12 <sup>a</sup> | 22.55±2.07 <sup>c</sup> |

Results are expressed as the “mean ± standard deviation” (n = 6); different letters in the same column indicate significant differences ( $p < 0.05$ ).
